# Supplementary material
Source: PubMed Central journal article supplement (PMC4328136)
Supplement: NIHMS652727-supplement-1.pdf [file NIHMS652727-supplement-1.pdf]

## Supplemental table 1

| Group Parameter      | Control      | 2 wk Sham       | 10wk Sham         |
|----------------------|--------------|-----------------|-------------------|
| HR                   | 559.4±23.4   | 472±8.8*        | 510.4±21.3        |
| MAP                  | 56±1.4       | 50±3.7          | 54±3.4            |
| ESP                  | 85.2±1.3     | 72.1±5.2*       | 76±4.5            |
| EDP                  | 2±1.6        | 1.67±0.1        | 4±1.8             |
| ESV                  | 13.8±1.8     | 35.6±2.5*       | 33.2±4.2*         |
| EDV                  | 40.5±2.4     | 61.2±3*         | 54.2±5*           |
| SV                   | 26.7±1.3     | 25.6±1.2        | 21±1.3*           |
| CO                   | 15687±745.2  | 11602.4±335.6*  | 10622.6±322.4*    |
| CI                   | 239±16       | 151.7±5*        | 168.8±10.6*       |
| EF                   | 70.4±2.6     | 42±1.7*         | 40.4±2.8*         |
| SW                   | 2279.8±169   | 2082.8±199.6    | 1777.9±146.2      |
| dP/dt <sub>max</sub> | 8526.5±424   | 4015.8±523.7*   | 5350.5±462.2*     |
| dP/dt <sub>min</sub> | -7862±414    | -4444.5±599*    | -5331.7±428.7*    |
| Tau-G                | 6.3±0.65     | 11.7±0.75*      | 10.3±1.3*         |
| MaxPower             | 519555±41334 | 188947.7±42581* | 294508.5±43464.8* |
| TPR                  | 4±0.3        | 4.2±0.4         | 5.1±0.4           |

Cardiac function in non-operated and sham operated control mice.

HR-heart rate (*beats per minute*), MAP-mean arterial pressure (*mmHg*), ESP-end-systolic pressure (*mmHg*), EDP-end-diastolic pressure (*mmHg*), ESV-end systolic volume ( $\mu$ l), EDV-end diastolic volume ( $\mu$ l), SV-stroke volume ( $\mu$ l), CO-cardiac output ( $\mu$ l/min), CI-cardiac index ( $\mu$ l/min/g), EF-ejection fraction (%), SW-stroke work (*mmHg*/ $\mu$ l), dP/dt<sub>max</sub>-maximum first derivative of change in systolic pressure with respect to time (*mmHg/sec*), dP/dt<sub>min</sub>-maximum first derivative of change in diastolic pressure with respect to time (*mmHg/sec*), Tau-Glantz-time constant of fall in ventricular pressure by Glantz method (*msec*), MaxPower-maximum power (*mWatts*), TPR-total peripheral resistance (*mmHg*/ $\mu$ l/min). \**P*<0.05 vs. control, (n=5-7 per group).
