# Supplementary material
Source: PubMed Central journal article supplement (PMC4328136)
Supplement: NIHMS652727-supplement-2.pdf [file NIHMS652727-supplement-2.pdf]

## Supplemental table 2

| Group Parameter      | Control      | 2 wk MI       | 10 wk MI        |
|----------------------|--------------|---------------|-----------------|
| HR                   | 559.4±23.4   | 488±11.5*     | 450±19.8*       |
| MAP                  | 56±1.4       | 54.3±3        | 40.2±3.8*       |
| ESP                  | 85.2±1.3     | 75.3±5.9      | 56±6*           |
| EDP                  | 2±1.6        | 11.5±1.6      | 2.9±0.6         |
| ESV                  | 13.8±1.8     | 20.6±3.9      | 44.5±10.8*      |
| EDV                  | 40.5±2.4     | 37.2±7        | 60.2±12.6       |
| SV                   | 26.7±1.3     | 16.2±3.1*     | 15.6±2*         |
| CO                   | 15687±745.2  | 7799.2±1545*  | 7109.6±1106*    |
| CI                   | 239±16       | 126.7±8*      | 152.3±15.4*     |
| EF                   | 70.4±2.6     | 42.1±2.6      | 27.9±2.3*       |
| SW                   | 2279.8±169   | 1029±229.6*   | 924.9±222.2*    |
| dP/dt <sub>max</sub> | 8526.5±424   | 4581.5±583    | 3036.5±251.3*   |
| dP/dt <sub>min</sub> | -7862±414    | -4734.8±726*  | 3028.6±365.6*   |
| Tau-G                | 6.3±0.65     | 10.7±1.4      | 17.2±2.4*       |
| MaxPower             | 519555±41334 | 227440±52738* | 117937.8±17734* |
| TPR                  | 4±0.3        | 4.2±0.4       | 6±0.65*         |

Cardiac function in non-operated control and MI mice.

Pressure-volume loop measurements in the closed chest configuration. HR-heart rate (*beats per minute*), MAP-mean arterial pressure (*mmHg*), ESP-end-systolic pressure (*mmHg*), EDP-end-diastolic pressure (*mmHg*), ESV-end systolic volume ( $\mu$ l), EDV-end diastolic volume ( $\mu$ l), SV-stroke volume ( $\mu$ l), CO-cardiac output ( $\mu$ l/min), CI-cardiac index ( $\mu$ l/min/g), EF-ejection fraction (%), SW-stroke work (*mmHg*/ $\mu$ l), dP/dt<sub>max</sub>-maximum first derivative of change in systolic pressure with respect to time (*mmHg/sec*), dP/dt<sub>min</sub>-maximum first derivative of change in diastolic pressure with respect to time (*mmHg/sec*), Tau-Glantz-time constant of fall in ventricular pressure by Glantz method (*msec*), MaxPower-maximum power (*mWatts*), TPR-total peripheral resistance (*mmHg*/ $\mu$ l/min). \**P*<0.05 vs. control, †*P*<0.05 vs. 10 wk MI, #*P*<0.05 vs. acute phase (n=7-9 per group).
