# Supplementary material
Source: PubMed Central journal article supplement (PMC4328136)
Supplement: NIHMS652727-supplement-3.pdf [file NIHMS652727-supplement-3.pdf]

**Supplemental table 3**

| Group Parameter | HW/TL    | TL        |
|-----------------|----------|-----------|
| CTL             | 6.54±0.1 | 17.98±0.2 |
| Sham            | 6.65±0.6 | 18.0±0.2  |
| MI              | 8.8±0.5* | 17.75±0.2 |
| MI+Epeptide MRS | 7.5±0.2  | 17.96±0.3 |
| MI+MRS          | 9.1±0.8* | 18.0±0.1  |

Heart weight to tibia length in 10 wk post-MI mice. \* $P < 0.05$  vs. Sham (n=5-7 per group).
